# Supplementary material for: Antihypertensive effects of rice peptides involve intestinal microbiome alterations and intestinal inflammation alleviation in spontaneously hypertensive rats
Source: Royal Society of Chemistry journal article supplement (doi:10.1039/d4fo04251d), 2024-12-18
Supplement: d4fo04251d1.pdf [file d4fo04251d1.pdf]

**File name: Supplemental information**

**Description: Supplementary Tables**

**Supplementary Table 1. Antibodies used in western blot**

| <b>Name</b>                                                        | <b>Species</b> | <b>Source</b>                              | <b>Catalog#</b> | <b>Concentration</b> |
|--------------------------------------------------------------------|----------------|--------------------------------------------|-----------------|----------------------|
| Occludin                                                           | Rabbit         | Proteintech                                | 13409-1-AP      | 1:1000               |
| ZO-1                                                               | Rat            | Santa Cruz Biotechnology                   | sc-33725        | 1:500                |
| HMGB1                                                              | Rabbit         | Proteintech                                | 10829-1-AP      | 1:4000               |
| TLR4                                                               | Rabbit         | Proteintech                                | 19811-1-AP      | 1:4000               |
| NF- $\kappa$ B<br>(D14E12)                                         | p65 Rabbit     | Cell Signaling Technology                  | 8242S           | 1:1000               |
| Phospho-NF- $\kappa$ B<br>p65 (Ser536)<br>(93H1)                   | Rabbit         | Cell Signaling Technology                  | 3033S           | 1:1000               |
| GAPDH                                                              | Mouse          | Proteintech                                | 60004-1-Ig      | 1:250000             |
| Horseradish<br>peroxidase-labeled<br>goat anti-rabbit<br>IgG (H+L) |                | Beijing Zhongshan Jinqiao<br>Biotechnology | ZB-2301         | 1:10000              |
| Horseradish<br>peroxidase-labeled<br>goat anti-mouse<br>IgG (H+L)  |                | Beijing Zhongshan Jinqiao<br>Biotechnology | ZB-2305         | 1:10000              |
| Horseradish<br>peroxidase-labeled<br>goat anti-rat IgG<br>(H+L)    |                | Beijing Zhongshan Jinqiao<br>Biotechnology | ZB-2307         | 1:10000              |

**Supplementary Table 2. Real-Time qPCR primers**

| <b>Gene</b>                    | <b>Forward primer (5'-3')</b> | <b>Reverse primer (5'-3')</b> |
|--------------------------------|-------------------------------|-------------------------------|
| <i>TNF-<math>\alpha</math></i> | GACCCTCACACTCAGATCATCTT       | CCTTGAAGAGAACCTGGGAGTAG<br>G  |
| <i>IL-6</i>                    | AAAGTCAACTCCATCTGCCCTTC       | TACTGGTCTGTTGTGGGTGGTAT       |
| <i>Tjp-1</i>                   | GAGAGGAAGAGCGCATGTCTAA<br>A   | GCTGTCCGACTTGAGCATATACA       |
| <i>Occludin</i>                | ACAGACCCAGACCACTATGAAA<br>C   | CTCTTCGCTCTCCTCTCTGTAGT       |
| <i>HMGB1</i>                   | TGAGAAGGATATTGCTGCCTACA       | CTCTTCCTCCTCTTCCTCATCCT       |
| <i>TLR4</i>                    | CCTCGAGTGGGAGGACAATG          | TGGGTTTTAGGCGCAGAGTT          |
| <i>Gapdh</i>                   | GAAGGTCGGTGTGAACGGAT          | CCCATTTGATGTTAGCGGGAT         |

TNF- $\alpha$ , tumor necrosis factor-alpha; IL-6, interleukin-6; TLR-4, toll-like receptor-4; Tjp-1, tight junction protein-1; HMGB1, high mobility box 1; GAPDH, Glyceraldehyde 3-phosphate dehydrogenase.
